# Supplementary material for: Design, synthesis, biological evaluation and molecular modelling of substituted pyrrolo[2,1-a]isoquinolinone derivatives: discovery of potent inhibitors of AChE and BChE
Source: Royal Society of Chemistry journal article supplement (doi:10.1039/d1nj00345c), 2021-01-01
Supplement: d1nj00345c1.pdf [file d1nj00345c1.pdf]

## *New Journal of Chemistry* Supporting Information

### **Design, Synthesis, Biological Evaluation and Molecular Modelling of Substituted pyrrolo[2,1-a]isoquinolinone derivatives: Discovery of Potent Inhibitors of AChE and BChE**

*Oscar Parravicini<sup>1</sup>, Emilio Angelina<sup>2</sup>, Roque Spinelli<sup>3</sup>, Francisco Garibotto<sup>1</sup>, Alvaro S. Siano<sup>3</sup>, Laura Vila<sup>4</sup>, Nuria Cabedo<sup>4,5</sup>, Diego Cortes<sup>5</sup> and Ricardo D. Enriz<sup>1\*</sup>*

<sup>1</sup>*Facultad de Química, Bioquímica y Farmacia, Universidad Nacional de San Luis; Instituto Multidisciplinario de Investigaciones Biológicas (IMIBIO-SL). Ejército de los Andes 950, 5700 San Luis, Argentina.*

<sup>2</sup>*Laboratorio de Estructura Molecular y Propiedades, IQUIBA-NEA, Universidad Nacional del Nordeste, CONICET, FaCENA. Av. Libertad 5470, Corrientes 3400, Argentina.*

<sup>3</sup>*Laboratorio de Péptidos Bioactivos, Departamento de Química Orgánica, Facultad de Bioquímica y Ciencias Biológicas, Universidad Nacional del Litoral, Santa Fe, Argentina.*

<sup>4</sup>*Instituto de Investigación Sanitaria INCLIVA. 46010 Valencia, Spain.*

<sup>5</sup>*Departamento de Farmacología, Facultad de Farmacia, Universidad de Valencia. 46100 Burjassot, Valencia, Spain.*

\* *Corresponding author. E-mail address: [denriz@unsl.edu.ar](mailto:denriz@unsl.edu.ar) (R. D. Enriz).*

**Figure S1.** AChE inhibitory activity. % of AChE activity as a function of the concentration of compounds **1-15**.

**Figure S2.** BChE inhibitory activity. % of BChE activity as a function of the concentration of compounds **1-15**.

**Figure S3.** AChE and BChE inhibitory activity. % of enzymatic activity as a function of the concentration of compounds of rivastigmine.

**Figure S4.** Spatial view of AChE-**12** and AChE-**13** complexes overlapped.

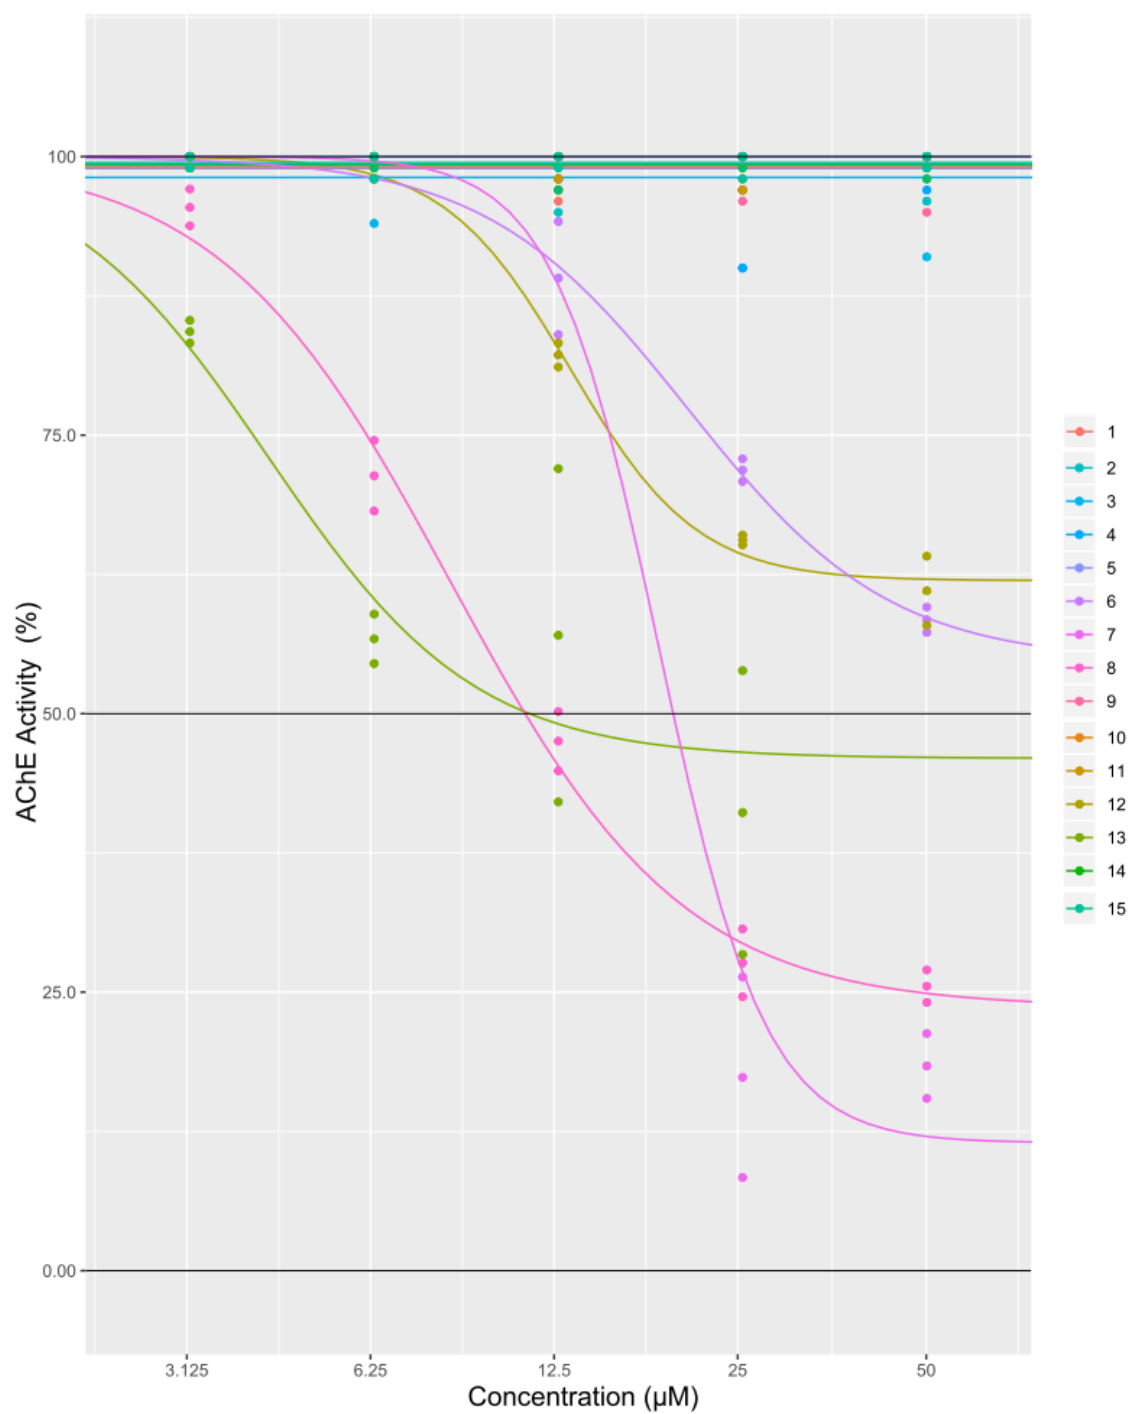

**Figure S1.** AChE inhibitory activity. % of AChE activity as a function of the concentration of compounds **1-15**.

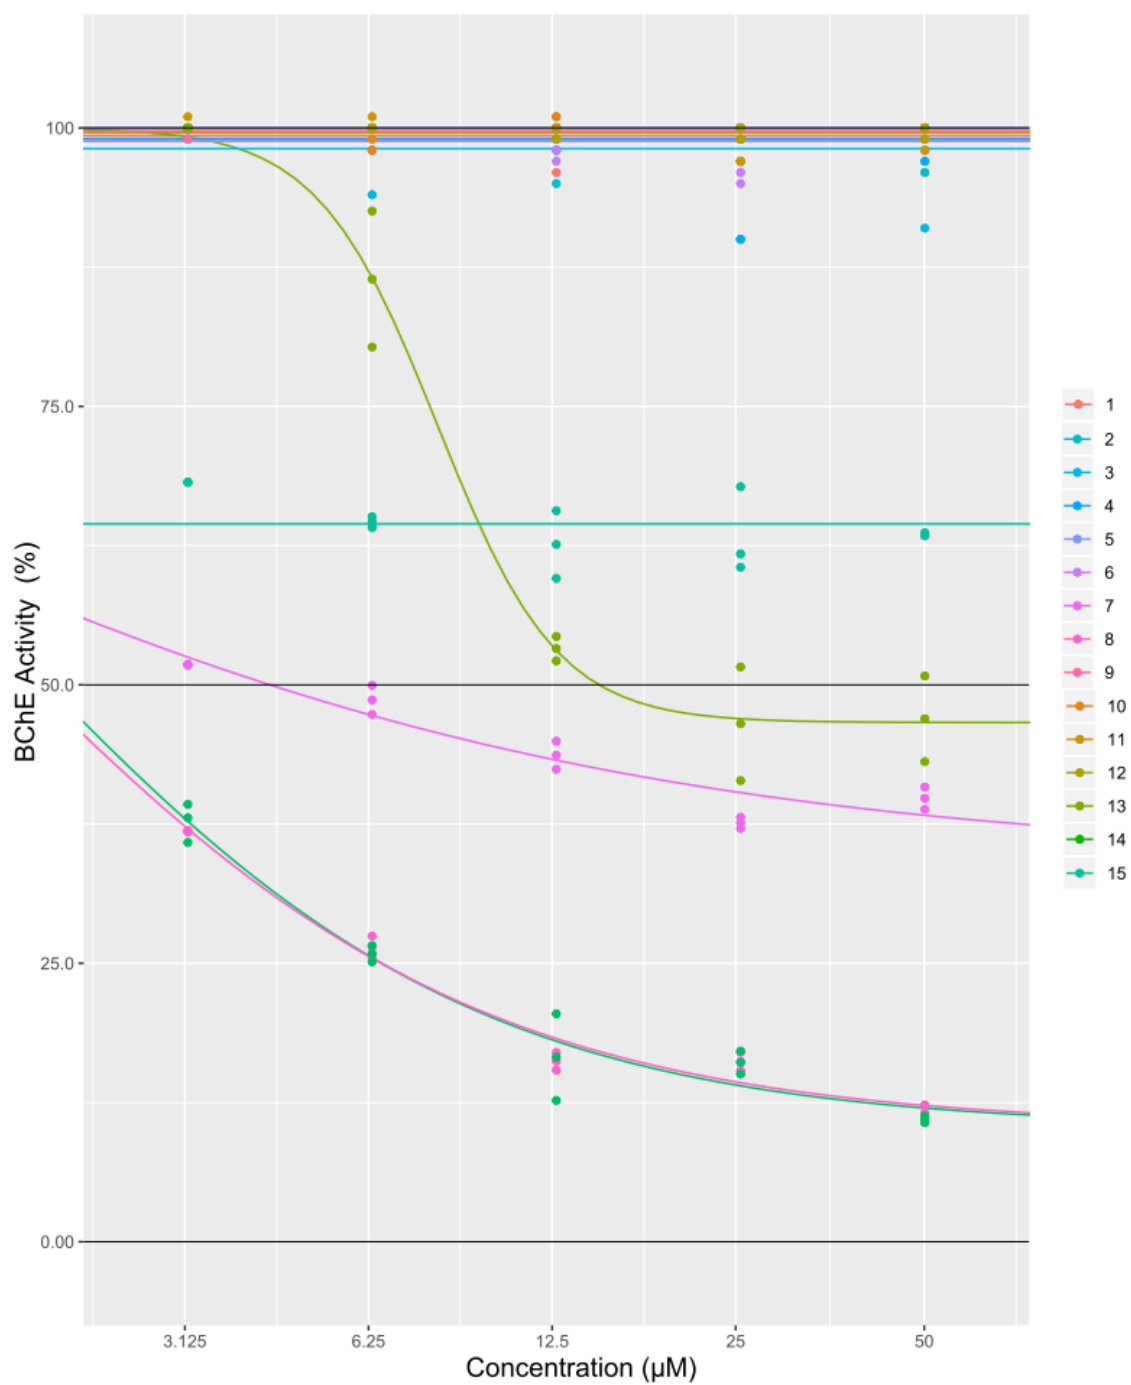

**Figure S2.** BChE inhibitory activity. % of BChE activity as a function of the concentration of compounds **1-15**.

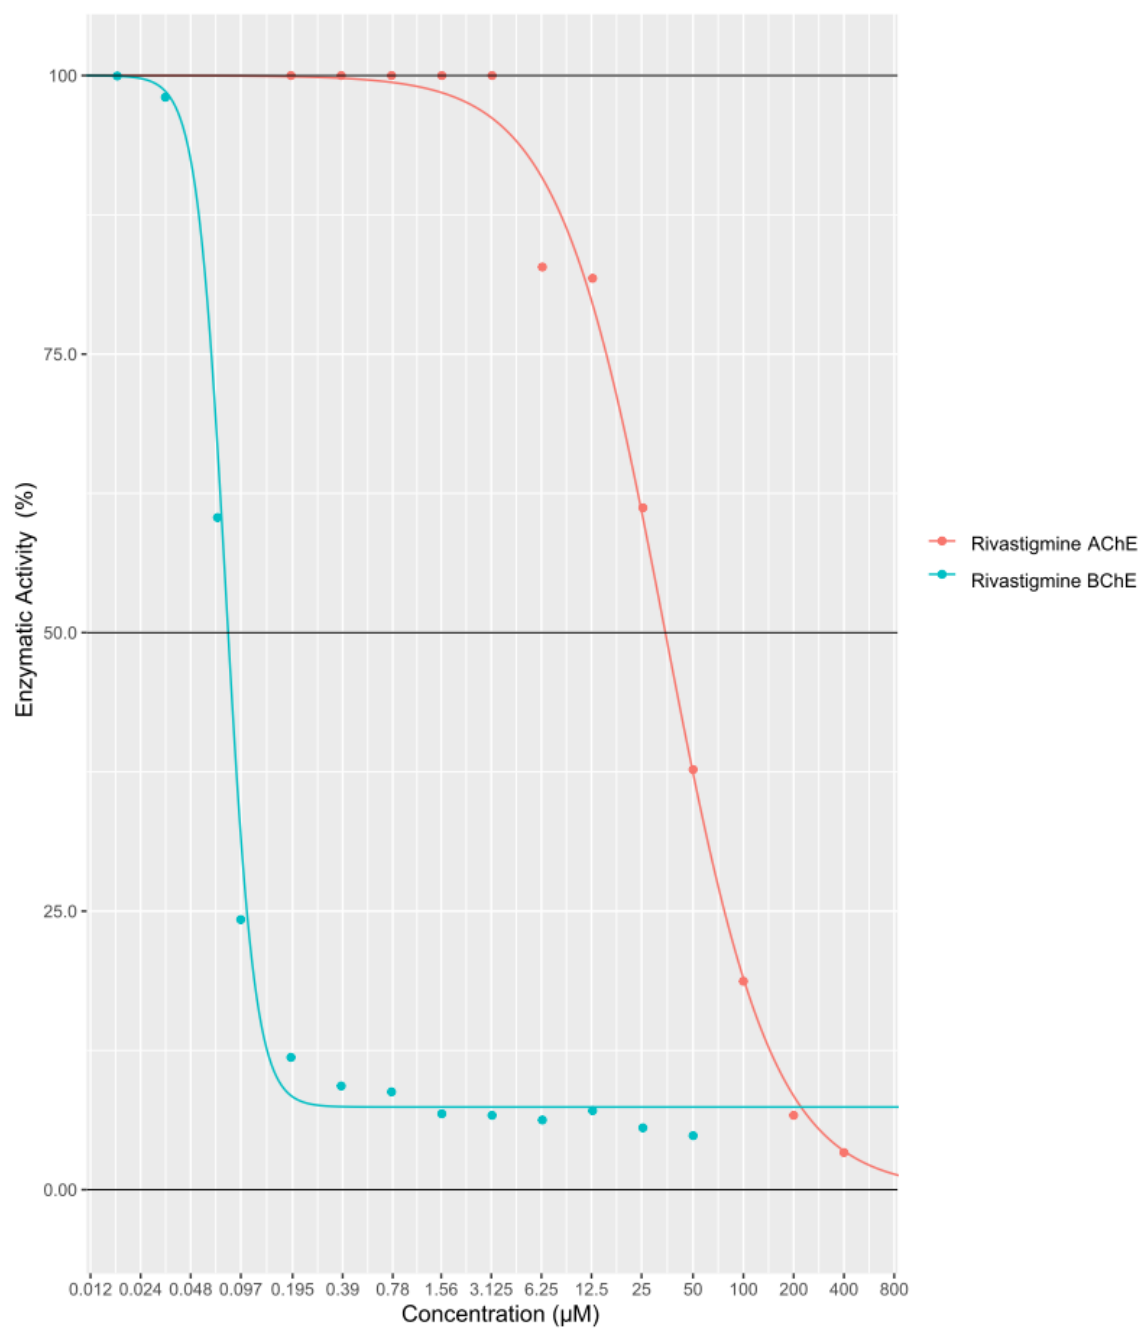

**Figure S3.** AChE and BChE inhibitory activity. % of enzymatic activity as a function of the concentration of rivastigmine.

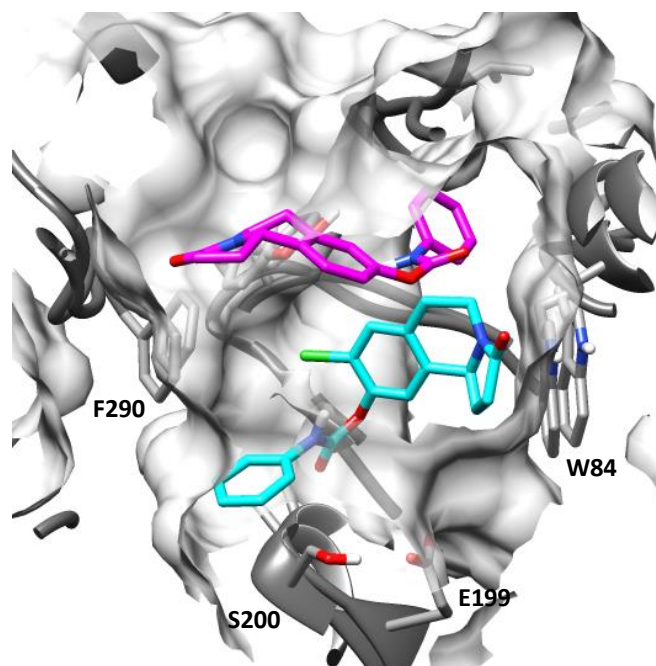

**Figure S4.** Spatial view of AChE-12 (magenta) and AChE-13 (cyan) complexes overlaid for comparison.
